# Supplementary material
Source: PubMed Central journal article supplement (PMC4955732)
Supplement: NIHMS790110-supplement-2.pdf [file NIHMS790110-supplement-2.pdf]

## Supplemental tables

**Supplementary Table 1.** Genes upregulated by activin A+IL12 versus beads (FC>2).

| gene     | FC: [ACTIVIN-IL12 / BEADS] | P-value: ACTIVIN-IL12 vs. BEADS |
|----------|----------------------------|---------------------------------|
| ABCA2    | 2.343450135                | 0.002362364                     |
| ADAM19   | 2.803580385                | 0.007991968                     |
| AFAP1    | 2.058737222                | 0.023893541                     |
| AHCYL2   | 2.708628088                | 0.018692016                     |
| AHNAK    | 2.440297918                | 0.021009203                     |
| ANXA3    | 6.143350904                | 0.07550199                      |
| APOD     | 4.7046                     | 0.068916717                     |
| ARHGAP31 | 2.972779067                | 1.54E-04                        |
| ATP2B4   | 2.221528477                | 7.80E-04                        |
| BBS12    | 3.970744385                | 0.062640403                     |
| BCYRN1   | 2.994805614                | 0.003134124                     |
| BMF      | 2.058931061                | 0.077258402                     |
| C5orf62  | 2.429442026                | 3.48E-05                        |
| CCL20    | 2.9472                     | 0.003248621                     |
| CD22     | 2.496985583                | 0.215917802                     |
| CD9      | 3.770795166                | 0.053135909                     |
| CDH3     | 2.310390903                | 0.124062594                     |
| CDO1     | 2.113184632                | 0.065495457                     |
| CLDN1    | 2.3948                     | 0.056881363                     |
| CSF2     | 2.419008135                | 0.208412737                     |
| CTSL1    | 4.4882                     | 0.002040349                     |
| CTTN     | 2.08278318                 | 0.001900218                     |
| CXCR5    | 6.65237215                 | 6.03E-05                        |
| CYB5R2   | 2.300346021                | 0.113056972                     |
| CYFIP1   | 2.622043011                | 2.97E-04                        |
| CYP1B1   | 2.3645667                  | 0.052112968                     |
| DIXDC1   | 5.020577407                | 0.001725683                     |
| DNAJC12  | 2.197351775                | 0.122979027                     |
| DOK5     | 2.4762                     | 0.005339894                     |
| DYRK3    | 2.028701031                | 2.08E-04                        |
| EBI3     | 2.269816972                | 0.021297931                     |
| FASLG    | 2.712617508                | 0.032013959                     |
| FES      | 3.361050328                | 6.03E-04                        |
| FOXP4    | 2.12645887                 | 0.001010786                     |
| FURIN    | 2.683904846                | 0.002065868                     |
| FUT7     | 6.381809773                | 0.002496982                     |
| G0S2     | 4.219453875                | 0.010307598                     |
| GCNT1    | 3.0932                     | 0.006862705                     |

|              |             |             |
|--------------|-------------|-------------|
| GPR132       | 2.009494483 | 6.01E-05    |
| GZMB         | 2.967922775 | 0.022227041 |
| GZMH         | 4.629574764 | 6.87E-06    |
| HMSD         | 2.209647786 | 0.043805433 |
| IFIT2        | 3.698113208 | 0.151644662 |
| IFIT3        | 3.589535865 | 0.125697797 |
| IFNG         | 16.82224551 | 0.002168453 |
| IL17F        | 2.106672042 | 0.305739162 |
| IL18RAP      | 4.622042528 | 6.21E-05    |
| IL21         | 3.689415822 | 0.029570055 |
| IL23R        | 7.543309685 | 1.48E-05    |
| IL24         | 2.368415825 | 0.008808211 |
| IL2          | 3.936564906 | 0.002781782 |
| IL4I1        | 2.74551049  | 0.002019898 |
| IL9          | 2.981111613 | 0.377102638 |
| ITGA3        | 3.845067236 | 2.33E-05    |
| JUN          | 2.193922011 | 1.24E-05    |
| KIAA1671     | 2.687468816 | 9.17E-04    |
| KLF7         | 2.204100145 | 0.012915117 |
| LAG3         | 2.098841962 | 0.011961576 |
| LIF          | 3.143715094 | 0.003442403 |
| LMNA         | 3.080678809 | 0.029280744 |
| LOC100128420 | 2.081359972 | 0.004962183 |
| LOC286442    | 2.735117319 | 0.018406427 |
| LPL          | 5.787974988 | 0.002729163 |
| LTA          | 2.016602157 | 0.044354832 |
| METRNL       | 2.106004941 | 0.032694905 |
| MIAT         | 2.376779685 | 0.049675981 |
| MIR4746      | 3.1312      | 0.216852372 |
| MIR762       | 3.56182266  | 0.082064038 |
| MLLT4        | 2.072467257 | 0.103036539 |
| MRC2         | 2.208469055 | 0.006027432 |
| MUC1         | 2.017707702 | 0.009417179 |
| MYO1E        | 2.313139492 | 0.062050154 |
| NAPSA        | 3.516305813 | 0.01319139  |
| NAPSB        | 10.66607143 | 1.82E-04    |
| NCF2         | 2.003478261 | 0.067077024 |
| NIPAL4       | 2.0608      | 0.013341123 |
| NPDC1        | 2.897599724 | 0.006080367 |
| PALLD        | 2.790146932 | 9.49E-05    |
| PDCD1        | 3.512473649 | 0.00329754  |
| PRG4         | 3.428571429 | 0.028950737 |
| PRR5L        | 9.812661629 | 1.87E-04    |

|             |             |             |
|-------------|-------------|-------------|
| PTK2        | 2.799674955 | 3.42E-05    |
| PVR         | 2.003006227 | 0.020477767 |
| RAB13       | 2.443252904 | 2.76E-04    |
| RASGRP4     | 2.511781232 | 0.05544781  |
| RBPJ        | 2.49313021  | 0.003054213 |
| RCN3        | 2.133333333 | 3.21E-04    |
| RGS16       | 3.285483528 | 3.46E-04    |
| RHOJ        | 2.312336416 | 0.018574666 |
| RORA        | 2.362512873 | 0.04175531  |
| SDC4        | 2.015622513 | 0.001583463 |
| SEMA7A      | 2.21884058  | 0.001886278 |
| SERPINB1    | 2.106170656 | 0.002649776 |
| SKIL        | 2.115481172 | 0.004192401 |
| SLC27A2     | 2.099541891 | 0.00604925  |
| SMAD7       | 2.07315851  | 0.001167526 |
| SNHG9       | 2.000840271 | 0.023068875 |
| SNORA5B     | 2.0024      | 0.218793038 |
| SNORA9      | 2.019125843 | 0.013152467 |
| SNORD116-22 | 2.146805618 | 0.101903273 |
| SNORD19     | 2.081740338 | 0.156440879 |
| SNORD1C     | 2.060313165 | 0.200291002 |
| SNORD43     | 2.136859822 | 0.177506908 |
| SPR         | 2.32695005  | 0.055070797 |
| SSTR3       | 2.724666771 | 3.41E-05    |
| STEAP1      | 2.6302      | 0.038804306 |
| TBKBP1      | 2.196003858 | 0.024298753 |
| TBX21       | 2.013489861 | 0.006428995 |
| THEM5       | 2.039467259 | 0.002797862 |
| TIAM2       | 2.5052      | 1.19E-04    |
| TMCC2       | 2.262604857 | 0.002688247 |
| TMPRSS6     | 2.290715417 | 0.10153529  |
| TNF         | 2.13887922  | 0.04173215  |
| TNFRSF12A   | 2.348153512 | 0.031720617 |
| TUBB6       | 2.506779336 | 0.003266087 |
| TYMP        | 2.558848049 | 5.97E-04    |

**Supplementary Table 2.** Genes downregulated by activin A+IL12 versus beads (FC<-2).

| gene      | FC: [ACTIVIN-IL12 / BEADS] | P-value: ACTIVIN-IL12 vs. BEADS |
|-----------|----------------------------|---------------------------------|
| ACSS1     | 0.464743422                | 4.04E-06                        |
| AGPAT9    | 0.363281987                | 0.029875941                     |
| AOAH      | 0.436423368                | 0.029072049                     |
| ATM       | 0.493678507                | 0.00587987                      |
| AUH       | 0.482671806                | 7.55E-04                        |
| B3GALNT1  | 0.469676623                | 0.141117557                     |
| BATF3     | 0.408364334                | 0.010935619                     |
| BCL2A1    | 0.497115852                | 7.12E-04                        |
| C10orf128 | 0.46152109                 | 0.102708906                     |
| C1orf162  | 0.332269728                | 6.78E-05                        |
| C5orf39   | 0.377603278                | 0.028999316                     |
| CARD17    | 0.439753738                | 0.208565191                     |
| CCNI2     | 0.490027447                | 0.007111892                     |
| CECR1     | 0.1405456                  | 1.15E-05                        |
| CXCR6     | 0.483002296                | 0.173892106                     |
| CYSLTR2   | 0.396873213                | 5.91E-04                        |
| EGFL6     | 0.431673                   | 0.130882851                     |
| FAM46C    | 0.459734845                | 0.053231101                     |
| FBLN5     | 0.327943074                | 0.016387211                     |
| FCER2     | 0.343878955                | 0.028505027                     |
| FLJ21408  | 0.170664095                | 0.001358903                     |
| GAB2      | 0.246886941                | 0.009272844                     |
| GATA3     | 0.315950532                | 6.39E-04                        |
| GPR18     | 0.402170384                | 0.022509743                     |
| GZMA      | 0.275258239                | 0.00337507                      |
| IL13      | 0.127714852                | 2.65E-04                        |
| IL8       | 0.470396413                | 0.134888016                     |
| ITGB7     | 0.435321006                | 1.80E-04                        |
| LGMN      | 0.33425345                 | 0.00538803                      |
| LIME1     | 0.426091131                | 0.022200017                     |
| LPAR6     | 0.494505358                | 0.004691165                     |
| LRRN3     | 0.392061871                | 0.002311384                     |
| MEOX1     | 0.328057082                | 0.00845204                      |
| MGC16121  | 0.379903125                | 0.087982459                     |
| MIR4658   | 0.498708963                | 0.298491488                     |
| MMP25     | 0.404853714                | 0.00681913                      |
| MYO3B     | 0.433087917                | 9.35E-04                        |
| PHLDA1    | 0.471949197                | 0.006000014                     |
| PIK3CG    | 0.413781361                | 0.002829081                     |
| PLAU      | 0.383435583                | 0.003004312                     |

|           |             |             |
|-----------|-------------|-------------|
| PRDM1     | 0.440053328 | 0.017654848 |
| PTGER2    | 0.290296353 | 0.071889013 |
| RAB37     | 0.376773198 | 0.011257109 |
| RCBTB2    | 0.360151447 | 0.003134647 |
| RGS1      | 0.357760354 | 0.151975181 |
| RTP4      | 0.405677642 | 0.00370187  |
| SCARB2    | 0.444132608 | 0.007395987 |
| SESN3     | 0.316170754 | 5.07E-04    |
| SLC35F3   | 0.468528069 | 0.020673247 |
| SLC9A3    | 0.498359585 | 0.027069683 |
| SMAD3     | 0.456403336 | 0.001260405 |
| SNORD121B | 0.489650949 | 0.152261603 |
| SNORD95   | 0.414329849 | 0.051992769 |
| SOS1      | 0.440173805 | 3.51E-04    |
| SPNS3     | 0.415432428 | 0.073382593 |
| ST3GAL5   | 0.485057862 | 4.10E-04    |
| TGFBR3    | 0.482766738 | 0.002947216 |
| TMEM71    | 0.488323232 | 0.005974872 |
| TRANK1    | 0.458041379 | 0.025238041 |
| TRIB2     | 0.492701228 | 0.037082962 |

**Supplementary Table 3.** Flow cytometry panels. Related to Experimental Procedures.

| marker                                        | fluorochrome         | clone      | vendor                    | dilution          |
|-----------------------------------------------|----------------------|------------|---------------------------|-------------------|
| <b>screening, surface</b>                     |                      |            |                           |                   |
| PD-1                                          | PE                   | eBioJ105   | eBioscience               | 1:50              |
| CXCR5                                         | BV421                | RF8B2      | BD Biosciences            | 1:1000 bulk order |
| ICOS                                          | PE-Cy7               | ISA-3      | eBioscience               | 1:33              |
| fixable viability dye                         | APC-eFluor 780       |            | eBioscience               | 1:1000            |
| <b>differentiation, surface</b>               |                      |            |                           |                   |
| PD-1                                          | PE                   | eBioJ105   | eBioscience               | 1:50              |
| CXCR5                                         | BV421                | RF8B2      | BD Biosciences            | 1:500 bulk order  |
| ICOS                                          | PE-Cy7               | ISA-3      | eBioscience               | 1:33              |
| CCR7                                          | Alexa Fluor 488      | G043H7     | BioLegend                 | 1:33              |
| CD4                                           | APC                  |            | BD Biosciences            | 1:50              |
| Integrin beta 7                               | FITC                 | FIB504     | eBioscience               | 1:33              |
| fixable viability dye                         | APC-eFluor 780       |            | eBioscience               | 1:1000            |
| or                                            |                      |            |                           |                   |
| SLAM                                          | PE                   | A12        | BioLegend                 | 1:25              |
| <b>differentiation, intranuclear</b>          |                      |            |                           |                   |
| CD4                                           | PerCP-eFluor 710     | SK3        | eBioscience               | 1:50              |
| CXCR5                                         | BV421                | RF8B2      | BD Biosciences            | 1:500 bulk order  |
| fixable viability dye                         | APC-eFluor 780       |            | eBioscience               | 1:1000            |
| BCL6                                          | Alexa Fluor 647      | K112-91    | BD Biosciences            | 1:10 bulk order   |
| FOXP3                                         | PE                   | 236A/E7    | eBioscience               | 1:50              |
| <b>differentiation, ICS</b>                   |                      |            |                           |                   |
| fixable viability dye                         | APC-eFluor 780       |            | eBioscience               | 1:1000            |
| IL-21                                         | PE                   | eBio3A3-N2 | eBioscience               | 1:25              |
| CD40L                                         | PerCP-eFluor 710     | 24-31      | eBioscience               | 1:25              |
| TNF $\alpha$                                  | FITC                 | MAb11      | BioLegend                 | 1:50              |
| LT $\alpha$                                   | PE                   | 359-81-11  | BioLegend                 | 1:25              |
| <b>Phosflow on PBMCs</b>                      |                      |            |                           |                   |
| pSMAD                                         | Purified             | D27F4      | Cell Signaling Technology | 1:400             |
| Goat anti-Rabbit IgG (H+L) Secondary Antibody | Alexa Fluor 647      | Polyclonal | Life Technologies         | 1:500             |
| CD4                                           | PerCP-eFluor 710     | SK3        | eBioscience               | 1:50              |
| CD45RA                                        | PE                   | HI100      | eBioscience               | 1:33              |
| P-MAPK                                        | Alexa Fluor 488      | 28B10      | Cell Signaling Technology | 1:50              |
| P-ERK                                         | BV421                | 20A        | BD Biosciences            | 1:25              |
| <b>Phosflow on tonsils</b>                    |                      |            |                           |                   |
| pSMAD                                         | Purified             | D27F4      | Cell Signaling Technology | 1:400             |
| Goat anti-Rabbit IgG (H+L) Secondary Antibody | Alexa Fluor 647      | Polyclonal | Life Technologies         | 1:500             |
| CD4                                           | PerCP-eFluor 710     | SK3        | eBioscience               | 1:50              |
| CD45RO                                        | FITC                 | UCHL1      | eBioscience               | 1:33              |
| PD-1                                          | PE                   | eBioJ105   | eBioscience               | 1:50              |
| CXCR5                                         | BV421                | RF8B2      | BD Biosciences            | 1:500 bulk order  |
| <b>NHP sorting</b>                            |                      |            |                           |                   |
| CD4                                           | APC                  | RPA-T4     | BD Biosciences            | 1:50              |
| CD45RA                                        | V450                 | 5H9        | BD Biosciences            | 1:25              |
| CD95                                          | PE-Cy7               | DX2        | eBioscience               | 1:33              |
| CD28                                          | PE                   | CD28.2     | eBioscience               | 1:25              |
| CCR7                                          | AlexaFluor 488       | G043H7     | BioLegend                 | 1:25              |
| fixable viability dye                         | APC-eFluor 780       |            | eBioscience               | 1:1000            |
| <b>NHP surface</b>                            |                      |            |                           |                   |
| CXCR5                                         | PE                   | MU5UBEE    | eBioscience               | 1:25              |
| ICOS                                          | PerCP-Cy5.5          | C398.4A    | BioLegend                 | 1:33              |
| PD-1                                          | Brilliant Violet 421 | EH12.1     | BD Biosciences            | 1:33              |
| CCR7                                          | Alexa Fluor 488      | G043H7     | BioLegend                 | 1:25              |
| CD4                                           | APC                  | RPA-T4     | BD Biosciences            | 1:50              |
| fixable viability dye                         | APC-eFluor 780       |            | eBioscience               | 1:1000            |
| <b>mouse surface</b>                          |                      |            |                           |                   |
| CXCR5 biotin                                  |                      | 2G8        | BD Biosciences            | 1:50              |
| Streptavidin                                  | Brilliant Violet 421 |            | BioLegend                 | 1:200             |
| PD-1                                          | APC                  | J43        | eBioscience               | 1:400             |
| ICOS                                          | PE                   | 7E.17G9    | eBioscience               | 1:200             |
| CD4                                           | FITC                 | GK1.5      | eBioscience               | 1:400             |
| CCR7                                          | PerCP-Cy5.5          | 4B12       | BioLegend                 | 1:400             |
| fixable viability dye                         | APC-eFluor 780       |            | eBioscience               | 1:1000            |

**Supplementary Table 4.** Equipment and settings used to acquire microscopy data.

**Figure 2a**

|                                                    |                                                |
|----------------------------------------------------|------------------------------------------------|
| Microscope                                         | Olympus FV10i                                  |
| Objective                                          | 60x 1.35 NA Immersol 518                       |
| Immersion                                          | F                                              |
| Detector                                           | Internal PMT                                   |
| Bit range                                          | 12                                             |
| Acquisition software                               | FV10-ASW 4.2                                   |
| Pixel scaling [ $\mu\text{m} \times \mu\text{m}$ ] | 0.160 x 0.160                                  |
| Original image size                                | 5747x6644 (stitch of multiple 1024x1024 tiles) |
| Zoom                                               | 1.3x                                           |
| Confocal aperture                                  | 116 $\mu\text{m}$ (1X)                         |

| Acquisition settings     | Channel 1 | Channel 2       | Channel 3       | Channel 4   |
|--------------------------|-----------|-----------------|-----------------|-------------|
| Fluorophore              | Hoechst   | Alexa Fluor 488 | Alexa Fluor 568 | DyLight 649 |
| Laser wavelength [nm]    | 405       | 488             | 559             | 635         |
| Laser nominal power [mW] | 17.1      | 11.9            | 15              | 9.5         |
| Transmissivity           | 0.059     | 0.366           | 1               | 1           |
| PMT voltage [V]          | 585       | 620             | 660             | 708         |
| Emission [nm]            | 420-460   | 490-590         | 570-670         | 660-760     |

**Figure 2b and Supplementary Figure 2b**

|                                                    |                                                |
|----------------------------------------------------|------------------------------------------------|
| Microscope                                         | Olympus FV10i                                  |
| Objective                                          | 60x 1.35 NA Immersol 518                       |
| Immersion                                          | F                                              |
| Detector                                           | Internal PMT                                   |
| Bit range                                          | 12                                             |
| Acquisition software                               | FV10-ASW 4.2                                   |
| Pixel scaling [ $\mu\text{m} \times \mu\text{m}$ ] | 0.148 x 0.148                                  |
| Original image size                                | 3830x3778 (stitch of multiple 1024x1024 tiles) |
| Zoom                                               | 1.4x                                           |
| Confocal aperture                                  | 116 $\mu\text{m}$ (1X)                         |

| Acquisition settings | Channel 1 | Channel 2   | Channel 3       | Channel 4   |
|----------------------|-----------|-------------|-----------------|-------------|
| Fluorophore          | Hoechst   | Alexa Fluor | Alexa Fluor 568 | DyLight 649 |

|                          |         |         |         |         |
|--------------------------|---------|---------|---------|---------|
| Laser wavelength [nm]    | 405     | 488     | 559     | 635     |
| Laser nominal power [mW] | 17.1 mW | 11.9 mW | 15 mW   | 9.5 mW  |
| Transmissivity           | 0.093   | 0.535   | 0.775   | 1       |
| PMT voltage [V]          | 520     | 606     | 615     | 725     |
| Emission [nm]            | 420-460 | 490-590 | 570-670 | 660-760 |

### Supplementary Figure 2a

Microscope ZEISS Axio Scan.Z1  
 Objective 20x 0.8 NA  
 Hamamatsu Orca Flash 4.0  
 Detector v2  
 Bit range 16  
 Acquisition software ZEN2 blue  
 Pixel scaling [ $\mu\text{m} \times \mu\text{m}$ ] 0.325 x 0.325  
 Image size 2920 x 2092 (stitch of multiple tiles)  
 Light source HXP 120,  
 100%

| Acquisition settings | Channel 1       | Channel 2       | Channel 3       | Channel 4 |
|----------------------|-----------------|-----------------|-----------------|-----------|
| Fluorophore          | Alexa Fluor 647 | Alexa Fluor 568 | Alexa Fluor 488 | Hoechst   |
| Reflector cube       | 50 Cy5          | 43 HE DsRed     | 38 HE GFP       | 49 DAPI   |
| Beam splitter [nm]   | 660             | 570             | 495             | 395       |
| Excitation [nm]      | 625-655         | 538-562         | 450-490         | 335-383   |
| Emission [nm]        | 665-715         | 570-640         | 500-550         | 420-470   |
| Exposure time [ms]   | 300             | 150             | 100             | 3         |



**Supplementary Table 5.** Total number of mapped reads for each RNA-seq sample.  
Related to Experimental Procedures.

| <b>Sample name</b>         | <b>Total number of uniquely mapped reads (excluding mitochondrial reads)</b> |
|----------------------------|------------------------------------------------------------------------------|
| ML_DN105_IL12              | 6211562                                                                      |
| ML_DN105_TGFb              | 6831972                                                                      |
| ML_DN105_TGFbplusIL12      | 6471897                                                                      |
| ML_DN105_activin           | 7923520                                                                      |
| ML_DN105_activinplusIL12   | 16240581                                                                     |
| ML_DN105_beadonly          | 5933043                                                                      |
| ML_DN111_IL12              | 14086300                                                                     |
| ML_DN111_TGFb              | 7009856                                                                      |
| ML_DN111_TGFbplusIL12      | 8227535                                                                      |
| ML_DN111_activin           | 9555758                                                                      |
| ML_DN111_activinplusIL12   | 13408134                                                                     |
| ML_DN111_beadonly          | 7722468                                                                      |
| ML_DN138_IL12              | 9691039                                                                      |
| ML_DN138_TGFb              | 8568097                                                                      |
| ML_DN138_TGFbplusIL12      | 7526478                                                                      |
| ML_DN138_activin           | 7758777                                                                      |
| ML_DN138_activinplusIL12   | 11585744                                                                     |
| ML_DN138_beadonly          | 7718322                                                                      |
| ML_DN140_1_beadonly        | 9545994                                                                      |
| ML_DN140_2_TGFb            | 8263440                                                                      |
| ML_DN140_3_IL12            | 14255322                                                                     |
| ML_DN140_4_TGFbplusIL12    | 14602957                                                                     |
| ML_DN140_5_activin         | 12786056                                                                     |
| ML_DN140_6_activinplusIL12 | 17163699                                                                     |
| ML_DN154_TGFb              | 12403005                                                                     |
| ML_DN154_TGFbplusIL12      | 7755578                                                                      |
| ML_DN154_activin           | 6616204                                                                      |
| ML_DN154_activinplusIL12   | 6415498                                                                      |

**Supplementary Table 6.** Tonsil GC Tfh gene set used for GSEA analysis.  
 Related to Experimental Procedures.

GC Tfh versus non FC>2

| Gene      |
|-----------|
| CXCR5     |
| CXCL13    |
| TOX2      |
| C20ORF100 |
| ICA1      |
| PDCD1     |
| ICA1      |
| CXCR5     |
| FAM43A    |
| PVALB     |
| SCGB3A1   |
| TOX2      |
| ASCL2     |
| CHI3L2    |
| CDK5R1    |
| CEBPA     |
| GNG4      |
| CXXC5     |
| GFOD1     |
| C3ORF21   |
| TIGIT     |
| POU2AF1   |
| HEYL      |
| C11ORF75  |
| CXXC5     |
| ATP9A     |
| KIAA1671  |
| SGPP2     |
| BCL6      |
| EGR2      |
| CDK5R1    |
| MYB       |
| LGMN      |
| CD79A     |
| KIAA1324  |
| NFATC1    |
| MYL6B     |
| BCAT1     |
| PASK      |
| CTLA4     |
| KCNK5     |
| PASK      |

|           |
|-----------|
| TOP2A     |
| CTTN      |
| LAG3      |
| ICOS      |
| THADA     |
| LHFPL2    |
| LGMN      |
| NFATC1    |
| MAF       |
| CHI3L2    |
| FABP5L2   |
| TYMS      |
| ID3       |
| TRIB1     |
| BTLA      |
| C14ORF145 |
| SLC9A9    |
| CAV1      |
| SH2D1A    |
| CTTN      |
| SH3TC1    |
| MAGEH1    |
| ST8SIA1   |
| IKZF3     |
| CTLA4     |
| HS.570988 |
| IGFBP4    |
| IKZF3     |
| NMB       |
| TBC1D4    |
| TRIM8     |
| CCDC50    |
| MYH10     |
| UBE2C     |
| PTPN11    |
| BTLA      |
| STK39     |
| UBE2C     |
| BLR1      |
| FAM46C    |
| C8ORF13   |
| ITM2A     |
| FABP5     |
| SPSB1     |
| CTLA4     |
| ODC1      |

|           |
|-----------|
| MERTK     |
| FBLN7     |
| CDC20     |
| SERTAD2   |
| TOX       |
| CORO1B    |
| SCD       |
| SHISA2    |
| ST8SIA1   |
| RAB27A    |
| CORO1B    |
| FAM167A   |
| CDCA5     |
| STX11     |
| LRRC1     |
| PTTG1     |
| CD200     |
| KIAA0101  |
| HS.571502 |
| LIMS1     |
| SLC7A5    |
| PON2      |
| FKBP5     |
| NUSAP1    |
| LOC642956 |
| NAB1      |
| C16ORF75  |
| PFKFB3    |
| DUSP6     |
| AIM2      |
| GADD45G   |
| COL6A3    |
| CKS2      |
| HS.390407 |
| FAM179A   |
| PHGDH     |
| NUDT7     |
| NFATC1    |
| CKS2      |
| RNF19A    |
| DUSP2     |
| PAQR4     |
| PPP1CC    |
| CDKL2     |
| SLC25A46  |
| CARHSP1   |

|           |
|-----------|
| HES6      |
| H1F0      |
| LIMS1     |
| SRGN      |
| UHRF1     |
| CDCA7     |
| SIRPG     |
| SRGN      |
| PTTG3P    |
| MT1E      |
| CD38      |
| C14ORF72  |
| ASB2      |
| KIFC1     |
| RDH10     |
| LRMP      |
| C17ORF96  |
| SERP2     |
| DDIT4     |
| P2RY11    |
| ITM2A     |
| NUCB2     |
| TMEM2     |
| ACTA2     |
| C16ORF87  |
| SERPINE2  |
| CASP9     |
| FLJ11795  |
| FABP5L2   |
| INPP1     |
| CCNB2     |
| SIRPG     |
| SGCE      |
| MTUS1     |
| GRAMD3    |
| HS.60257  |
| HLA-A29.1 |
| CCNA2     |
| AFF3      |
| RNF19A    |
| LOC440871 |
| NCALD     |
| ANKRD55   |
| ATPGD1    |
| AGMAT     |
| TRIM32    |

|           |
|-----------|
| H2AFZ     |
| CPA5      |
| MCM4      |
| MAPK6     |
| KIAA0182  |
| NDFIP2    |
| ANKRD35   |
| UBE2E3    |
| CNIH      |
| CDC45L    |
| SEPN1     |
| LIMS2     |
| NETO2     |
| GLCCI1    |
| FAAH2     |
| RPL39L    |
| SSH2      |
| RPL39L    |
| PHACTR2   |
| ERMP1     |
| PON2      |
| C9ORF16   |
| PTTG1     |
| TNFRSF18  |
| C1ORF198  |
| ANKS1B    |
| SOCS1     |
| LOC729816 |
| FEN1      |
| PYHIN1    |
| PTPN13    |
| QPRT      |
| SEPN1     |
| ASPM      |
| C20ORF55  |
| ACTN1     |
| STMN1     |
| NCALD     |
| SIRPG     |
| MYO5A     |
| DLGAP5    |
| ECOP      |
| FABP5     |
| MEIS3P1   |
| MGC33556  |
| PTPN13    |

|           |
|-----------|
| POMT1     |
| LAT       |
| NUSAP1    |
| CNIH      |
| AURKB     |
| SYT11     |
| CNIH      |
| BCAS4     |
| INSIG1    |
| ALPK2     |
| LOC644132 |
| WSB2      |
| RAB11FIP1 |
| NR3C1     |
| TRAF3IP2  |
| GINS2     |
| RFC5      |
| FAM110A   |
| RILPL2    |
| AURKA     |
| IL2RB     |
| ASAP1     |
| COL6A3    |
| GK        |
| TSPAN5    |
| ALDH5A1   |
| TIAM1     |
| CBLB      |
| AURKA     |
| CENPM     |
| ASF1B     |
| ATPGD1    |
| C3ORF37   |
| CLINT1    |
| CCNF      |
| TK1       |
| SMPDL3A   |
| C6ORF105  |
| C7ORF44   |
| PYHIN1    |
| SIPA1L2   |
| JARID2    |
| C1ORF85   |
| NEK2      |
| ORMDL3    |
| PGAM4     |

|           |
|-----------|
| CENPA     |
| TSHR      |
| BAZ2B     |
| ATP6V1D   |
| RAB27A    |
| ASAP1     |
| LOC653566 |
| C12ORF35  |
| ZFPM1     |
| TM2D3     |
| RAB37     |
| BCAS4     |
| KIF2C     |
| CEP55     |
| GPR19     |
| F2R       |
| NCAPG     |
| BIRC5     |
| SRPK2     |
| BIK       |
| FBXO33    |
| CKS1B     |
| MAPKAPK3  |
| PTPN2     |
| LBH       |
| PTPN7     |
| UBE2G1    |
| SH3RF3    |
| CDKN3     |
| MCM6      |
| FHL2      |
| TJP2      |
| IFNAR2    |
| VOPP1     |
| LOC728069 |
| IRF4      |
| HMMR      |
| CDK6      |
| FAM164A   |
| HIF1A     |
| P2RX5     |
| CXCR4     |
| TMEM99    |
| FYN       |
| DCUN1D3   |
| HS.542413 |



|           |
|-----------|
| BATF      |
| CDT1      |
| LOC399942 |
| GF11      |
| CDC2      |
| ARHGAP10  |
| PRKCZ     |
| IL6R      |
| TIMP2     |
| LTA       |
| KPNA2     |
| MELK      |
| PPP2R5C   |
| PYHIN1    |
| CASP3     |
| HS.547738 |
| LOC729086 |
| PPP1R16B  |
| POMT1     |
| CENPN     |
| HMMR      |
| BUB1      |
| VWA5A     |
| DLGAP5    |
| HS.538259 |
| FAM160B1  |
| PPP2R5C   |
| TMEM64    |
| MBOAT1    |
| FAM134B   |
| TP53INP1  |
| RBBP8     |
| RYR1      |
| TSHR      |
| GK        |
| AKAP13    |
| TNFRSF18  |
| LOC729086 |
| PCNA      |
| DUSP6     |
| HIST1H2BD |
| LOC92755  |
| HES4      |
| NAP1L4    |
| PLCH2     |
| GAPDH     |

|         |
|---------|
| HECW2   |
| TRIB2   |
| SAT1    |
| SLC29A1 |
| ZFP91   |
| MTUS1   |
| RACGAP1 |
| MCM2    |
| ALDH5A1 |
| SFXN1   |
